# Supplementary material
Source: Springer Nature journal article supplement (https://www.springermedizin.de/resource/supplementary/12874_2011_613_MOESM4_ESM.pdf/9432580)
Supplement: MOESM4 [file 9432580]

## Simulation Steps

1. Assume a baseline mean and cluster level standard deviation

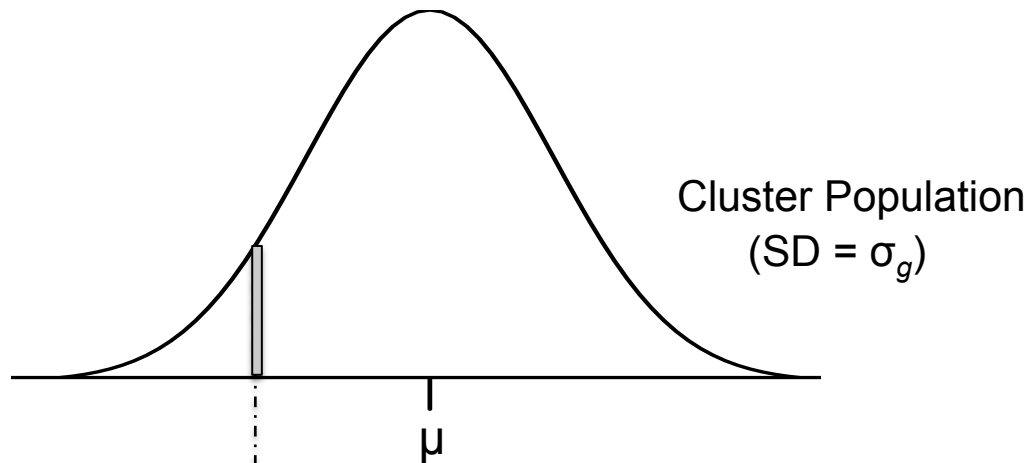

2. Draw a random effect  $b_i$  for each cluster  $i$

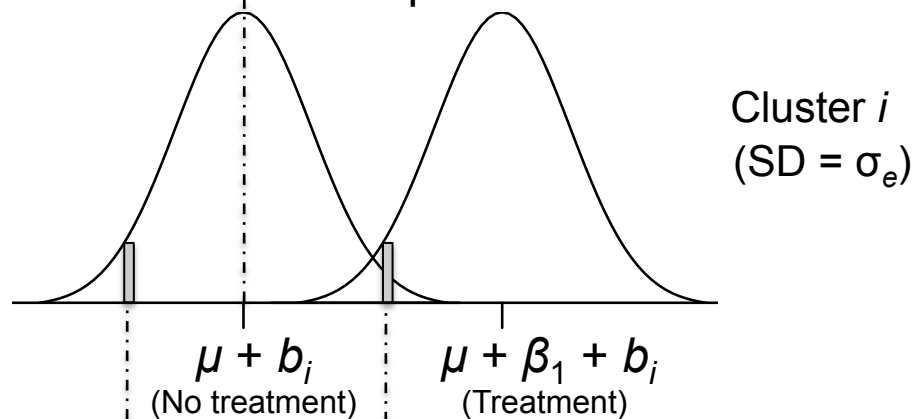

3. Assign treatment or no treatment to cluster  $i$

4. Draw error term for child  $j$  in cluster  $i$ , compute  $y_{ij}$

$y_{ij} = \mu + b_i + \varepsilon_{ij}$  or  $y_{ij} = \mu + \beta_1 + b_i + \varepsilon_{ij}$  Child  $ij$
